# Supplementary material for: Cu(i)-mediating Pt reduction to form Pt-nanoparticle-embedded Nafion composites and their electrocatalytic O2 reduction
Source: Royal Society of Chemistry journal article supplement (doi:10.1039/c2jm33076h), 2012-01-01
Supplement: c2jm33076h.pdf [file c2jm33076h.pdf]

# Cu(I)-Mediating Pt Reduction to Form Pt-Nanoparticle-Embedded Nafion Composites and Their Electrocatalytic O<sub>2</sub> Reduction

Jing-Fang Huang,<sup>\*a</sup> and Wen-Rhone Chang<sup>a</sup>

## Supporting information

### Experimental Section

**Chemicals:** Potassium tetrachloroplatinate 99.9% (Alfa), copper nitrate 99.7% (JT-Baker), sodium nitrate (JT-Baker), sulfuric acid (Aldrich), and Nafion perfluorinated resin (5%) in a mixture of lower aliphatic alcohols and water (Aldrich) were used without purification.

**Fabrication of nPts-embedded Nafion (NF(Pt<sub>nano</sub>)) composite:** Electrochemical experiments were conducted using a CHI 660C potentiostat/galvanostat. A three-electrode electrochemical cell was used for the electrochemical experiments. Ag/AgCl (3.0 M KCl) and a Pt wire were used as the reference and counter electrodes, respectively. A glassy carbon (GC) electrode (Pine Instruments, 5.0 mm diameter) was used as a substrate electrode for Nafion (NF) membrane or NF(Pt<sub>nano</sub>) composite. The GC electrode was successively polished with 1.0-, 0.3-, and 0.05- $\mu$ m alumina powder cloth (Buchler) followed by sonication in deionized water (specific resistivity, 18.2 M $\Omega$  cm<sup>-1</sup>) and dried before use. Next, 6  $\mu$ l of 5% NF coating solution was spin-coated onto the GC electrode at 3000 rpm. A uniform NF thin film was covered on the GC electrode (NF@GC) by evaporating the solvent at room temperature after about 3 min of spinning. The NF(Pt<sub>nano</sub>) composite was obtained by multiple-scan CV between 0.7 V and 0.05 V vs. Ag/AgCl (potential range for Cu<sup>2+</sup>/Cu<sup>+</sup>) in 0.1 M NaNO<sub>3</sub> solution containing 0.1 mM PtCl<sub>4</sub><sup>2-</sup> and 0.1 mM Cu<sup>2+</sup>. The scan rate was 50 mV s<sup>-1</sup> and the temperature was 28°C. The nPt loading was also controlled by the CV sweeping cycle times. The nPt mass was determined directly from the Cu<sup>2+</sup> reduction charge using Faraday's law of electrolysis. The reduction charge for Cu<sup>2+</sup>/Cu<sup>+</sup> was recorded from the charge under the voltammetric peaks in (0.7– -0.05 V vs. Ag/AgCl). Specifically, 1 eq. nPt must be produced to consume 2 eq. Cu<sup>+</sup>. The microstructure of nPts in the NF(Pt<sub>nano</sub>) composite was observed using a JEOL JEM-1400 Transmission Electron Microscope (TEM) and a JEOL JEM-2100F Field Emission Transmission Electron Microscope (FE-TEM). TEM samples were prepared using NF covered Ti TEM grids (NF@Ti) directly as the working electrode. The Ti grid is used as a conducting substrate to support NF film because Ti provides an ideal polarization behavior similar to that on GC substrate in the same potential range. The NF(Pt<sub>nano</sub>) composite was formed on the Ti TEM grid by the same procedure as on the GC substrate. X-ray photoelectron spectroscopy (XPS) was employed for surface element analysis of the as-prepared NF(Pt<sub>nano</sub>) composite. XPS data were obtained using an ULVAC-PHI, PHI 5000 VersaProbe/Scanning ESCA Microprobe. Instead of using GC disks, GC plates (from Alfa) were used as

the working electrodes for XPS sample preparation. For X-ray diffraction (XRD) measurements (Cu K $\alpha$  radiation), an ITO glass slide (10  $\times$  10 mm) was used as the substrate for NF(Pt<sub>nano</sub>) composite to avoid interference from the substrate signal. The ITO glass slide was sonicated in acetone and ethanol solutions for 20 min, sequentially rinsed with deionized water (specific resistivity 18.2 M $\Omega$  cm<sup>-1</sup>), and dried in an oven before being used as the working electrode. Next, 5% NF was dip-coated onto the ITO glass slide. A uniform NF thin film was deposited on the ITO glass slide (NF@ITO) by evaporation in air at room temperature after about 30 min. The NF(Pt<sub>nano</sub>) composite was formed on the NF@ITO by the same procedure as on the GC substrate.

*Electrochemical measurements:* A NF(Pt<sub>nano</sub>) composite covered GC RDE (Pine Instruments, 5.0 mm diameter) was used as the working electrode for ORR measurement. The as-prepared working electrode was electrochemically cleaned using a cycling potential between 0.0 and 1.0 V (vs. RHE) for 30 times in an Ar-purged 0.5 M sulfuric acid. The electrochemical surface areas (ECSA) were determined by measuring the areas (charges) under the hydrogen adsorption/desorption peaks of the cyclic voltammograms (scan rate, 0.2 V s<sup>-1</sup>) in a 0.5 M sulfuric acid solution. A conversion factor of 210  $\mu$ C cm<sup>-2</sup> was used to determine the ECSA.<sup>[15]</sup> Oxygen reduction reaction (ORR) experiments were performed in oxygen-saturated 0.1M HClO<sub>4</sub> aqueous solution. The solution was purged for at least 30 min to ensure oxygen saturation. A three-electrode electrochemical cell was used for the ORR electrochemical experiments. Ag/AgCl (3.0 M KCl) and a Pt wire were used as the reference and counter electrodes, respectively; however, all potentials are quoted with respect to a reversible hydrogen electrode (RHE). The scan rates for ORR in CV and RDE measurements were 50 mV/s and 10 mV/s, respectively. The necessary electrode rotation for RDE voltammetry experiments was provided by a Pine Model AFMSR electrode rotator. The kinetic current for ORR is derived from the Koutecký-Levich equation.<sup>42</sup>

$$\frac{1}{j} = \left( \frac{1}{j_k} + \frac{1}{j_D} \right) = \left( \frac{1}{j_k} + \frac{1}{B\omega^{0.5}} \right)$$

where  $j$  is the measured current density;  $j_k$  and  $j_D$  are the kinetic and diffusion current densities, respectively;  $B$  is a constant; and  $\omega$  is the rotation speed. The experimental value of the  $B$  factor, 0.091 mA s<sup>-0.5</sup>, is close to the calculated value, 0.092 mA s<sup>-0.5</sup>, for an ideal 4e<sup>-</sup> process. Calculation of the  $B$  factor ( $B = 0.62nFAD_{O_2}^{2/3}\nu^{1/6}C_{O_2}$ ) was based on published values for the diffusion coefficient of O<sub>2</sub> ( $D_{O_2} = 1.93 \times 10^{-5}$  cm<sup>2</sup> s<sup>-1</sup>), kinetic viscosity of the solution  $\nu$  ( $\nu = 1.009 \times 10^{-2}$  cm<sup>2</sup> s<sup>-1</sup>), concentration of dissolved O<sub>2</sub> in solution ( $C_{O_2} = 1.26 \times 10^{-3}$  mol L<sup>-1</sup>), Faraday constant ( $F$ ), and the electrode's geometric area ( $A$ ). The specific activity was calculated using ECSA. The mass activity was obtained by dividing the kinetic current on 0.90 V by the nPt mass.

**Figure s1.**

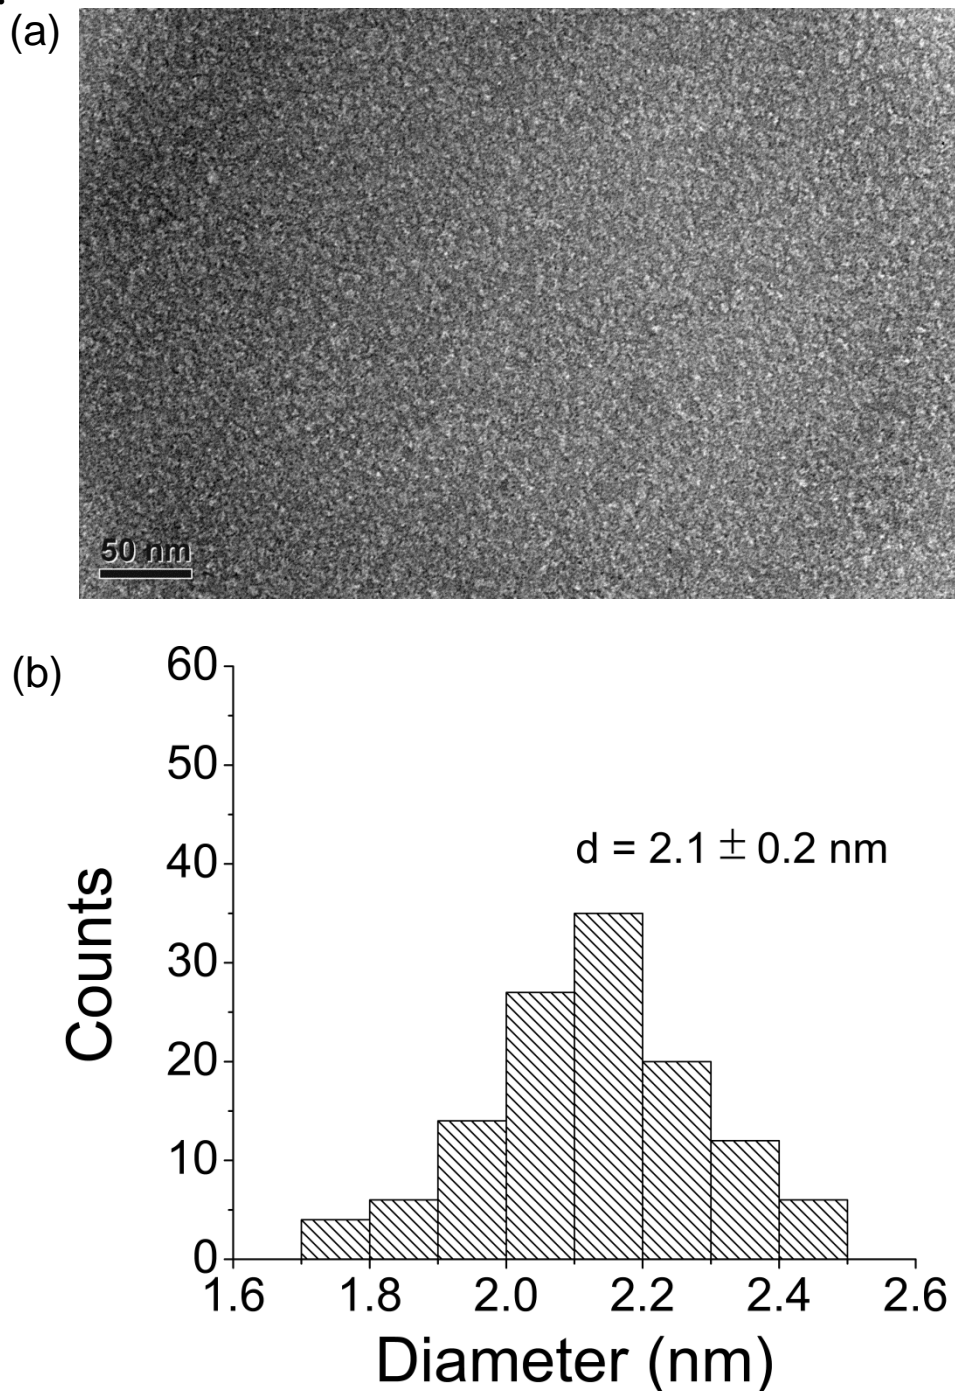

**Figure s1.** (a) TEM image and particle-size distribution of nPts in the NF(Pt<sub>nano</sub>) composite covered Ti grid. (b) The particle-size distribution is based on 120 randomly selected particles in a).

**Figure s2.**

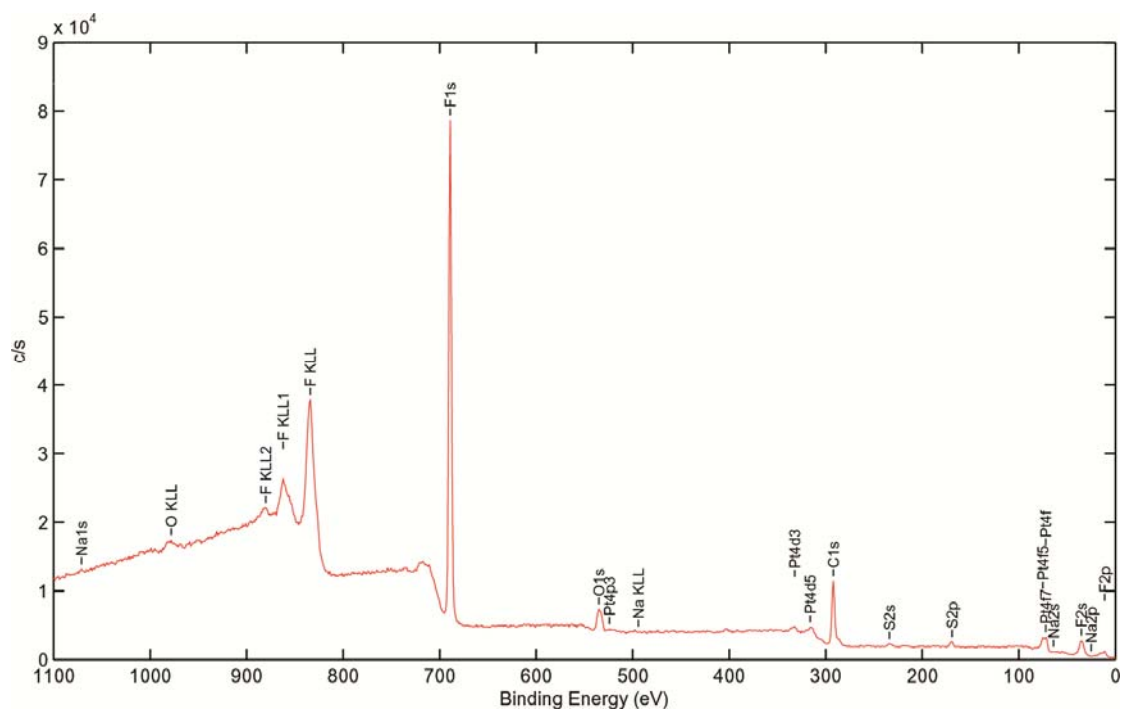

**Figure s2.** A XPS spectrum of the NF(Pt<sub>nano</sub>) composite.

**Figure s3.**

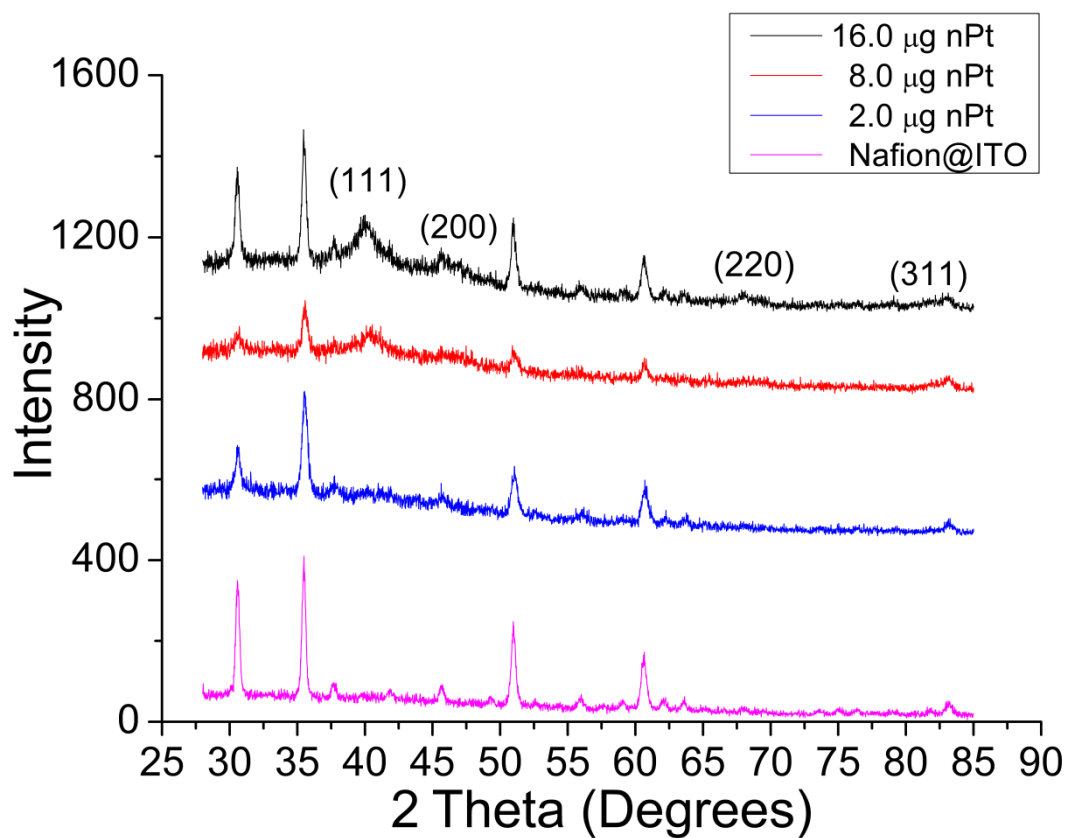

**Figure s3.** XRD patterns ( $\text{Cu K}\alpha$ ) of a series of  $\text{NF}(\text{Pt}_{\text{nano}})$  composites were obtained on the Nafion covered ITO (Indium Tin Oxide) slide ( $10\text{ mm} \times 10\text{ mm}$ ) and the bare Nafion covered ITO substrate. The reflection patterns were assigned in accordance with JCPDS card no. 882343 for Pt.

**Figure s4.**

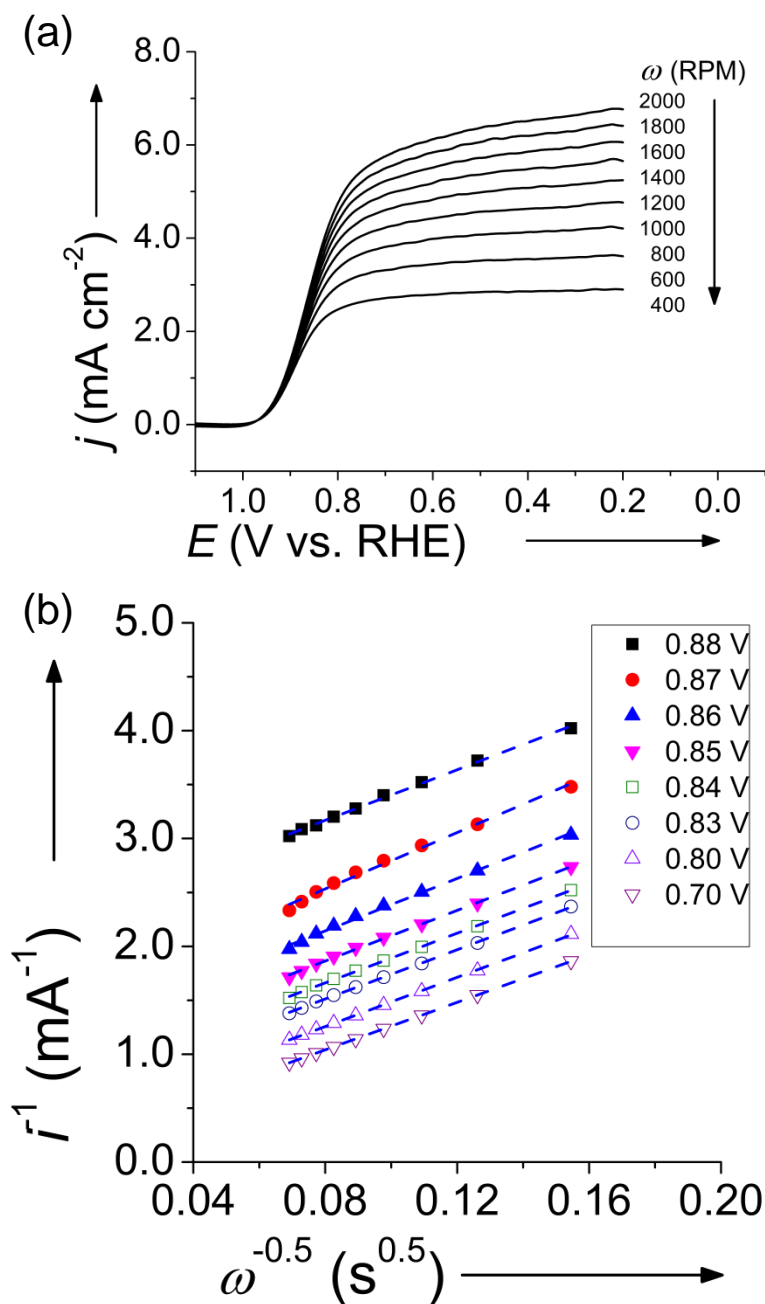

**Figure s4.** (a) ORR polarization curves of the NF(Pt<sub>nano</sub>) composite (nPt loading is 40.0  $\mu\text{g cm}^{-2}$ ) modified GC RDE at various rates of rotation recorded at room temperature in O<sub>2</sub>-saturated 0.1 M HClO<sub>4</sub> aqueous solution. The scan rate was 10 mV/s. (b) Koutecký-Levich plots at different potentials obtained from the data in (a).



**Figure s5.**

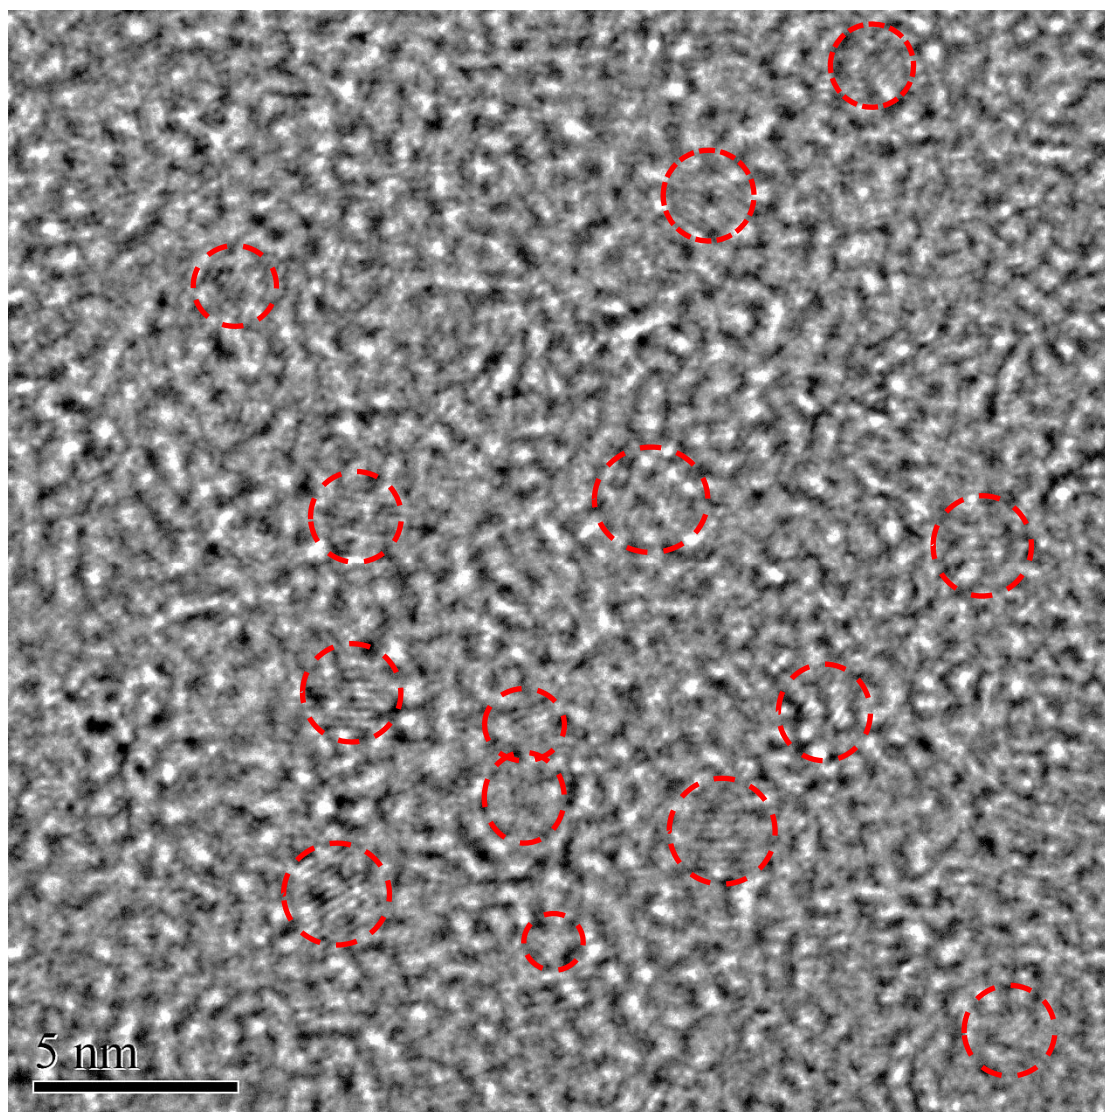

**Figure s5.** High-resolution TEM of the nPts in the NF(Pt<sub>nano</sub>) composite covered Ti grid. The nPts are marked by red dash circles.
